# Supplementary material for: Structural basis for SARS-CoV-2 neutralizing antibodies with novel binding epitopes
Source: PLoS Biol. 2021 May 7;19(5):e3001209. doi: 10.1371/journal.pbio.3001209 (PMC8133496; doi:10.1371/journal.pbio.3001209)
Supplement: S5 Data — (XLSX) [file pbio.3001209.s017.xlsx]

## Sheet: Sheet1
	PR1077			PR953			PR961			PC			NC
15000	0.507	0.5037	0.4895	0.2142	0.2094	0.2144	0.1443	0.1298	0.136	2.8524	2.9301		0.4022
1500	0.1489	0.1384	0.1306	0.0995	0.1029	0.1066	0.1028	0.0945	0.0963	2.9514	2.9894		0.1446
150	0.1144	0.1074	0.1008	0.082	0.0892	0.0961	0.0934	0.0841	0.0812	2.1411	2.3046		0.1232
15	0.1176	0.1121	0.0975	0.0736	0.084	0.0896	0.0887	0.0789	0.0805	0.6087	0.6253		0.1112
1.5	0.1251	0.1074	0.0997	0.078	0.0814	0.0869	0.0948	0.0833	0.0837	0.1619	0.1639		0.1072
0.15	0.1177	0.1158	0.1078	0.0907	0.0863	0.104	0.0956	0.0876	0.085	0.1263	0.1109		0.1197
0.015	0.1251	0.1215	0.119	0.1083	0.1194	0.113	0.1037	0.1139	0.1001	0.1131	0.1261		0.1385
0	0.1422	0.1382	0.1435	0.1336	0.1356	0.133	0.125	0.1351	0.1307	0.1444	0.1397		0.1298
